# Supplementary material for: Las peturbaciones armónicas y los niveles de CEM en relación a la corrección del factor de potencias
Source: Royal Society of Chemistry journal article supplement (doi:10.1039/d4sm00987h), 1998-01-01
Supplement: d4sm00987h1.pdf [file d4sm00987h1.pdf]

## **Aging Iridium Oxide Catalyst Inks: A Formulation Strategy to Enhance Ink Processability for Polymer Electrolyte Membrane Water Electrolyzers**

Sunilkumar Khandavalli,<sup>\*a</sup> Jae Hyung Park,<sup>b</sup> Robin Rice,<sup>a</sup> Diana Y. Zhang,<sup>ac</sup> Sarah A. Berlinger,<sup>d</sup> Guido Bender,<sup>a</sup> Deborah J. Myers,<sup>b</sup> Michael Ulsh,<sup>a</sup> and Scott A. Mauger<sup>a</sup>

### **Supporting Information**

---

<sup>a</sup> Chemistry and Nanoscience Department, National Renewable Energy Laboratory, 15013 Denver West Parkway, Golden, Colorado, 80401, United States, Email: [skhandav@nrel.gov](mailto:skhandav@nrel.gov)

<sup>b</sup> Chemical Sciences and Engineering Division, Argonne National Laboratory, Argonne, Illinois 60439, United States

<sup>c</sup> Department of Chemical Engineering and Materials Science, University of Minnesota, Minneapolis, Minnesota, 55455, United States

<sup>d</sup> Energy Conversion Group, Lawrence Berkeley National Laboratory, Berkeley, California 94720, United States

## Table of Contents

1. Effect of resting procedure: steady-shear rheology
2. Effect of IrO<sub>2</sub> concentration on ink aging: steady-shear rheology
3. Effect of ionomer concentration on ink aging: Frequency sweep data
4. USAXS: Volume size distribution comparison plots of fresh water-rich inks
5. Electrophoretic mobility and dynamic light scattering measurements
6. Steady-shear rheology of water-rich neat ionomer dispersions at different aging times
7. Transient rheology of aged water-rich inks
8. Steady-shear rheology data of water-rich inks containing Nafion D2020 and D2021
9. EIS polarization curves
10. Cyclic Voltammetry Data

## 1. Effect of resting procedure: steady-shear rheology

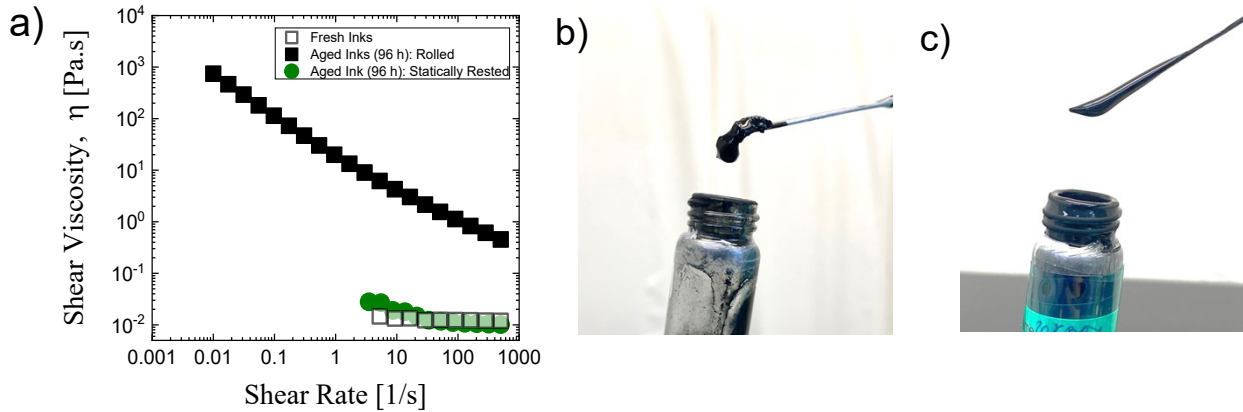

**Figure S11.** Steady rheology comparison of aged inks ((20% IrO<sub>2</sub> – 90% H<sub>2</sub>O) – 0.2 I/C) with different resting procedures. The data includes rolled inks and statically rested inks that were sonicated (1 h) prior to making measurements. The data of fresh inks is also included. Images of b) statistically rested and c) rolled inks after 96 h aging time examining the ink sample at the bottom of the vial.

## 2. Effect of IrO<sub>2</sub> concentration on ink aging: steady-shear rheology

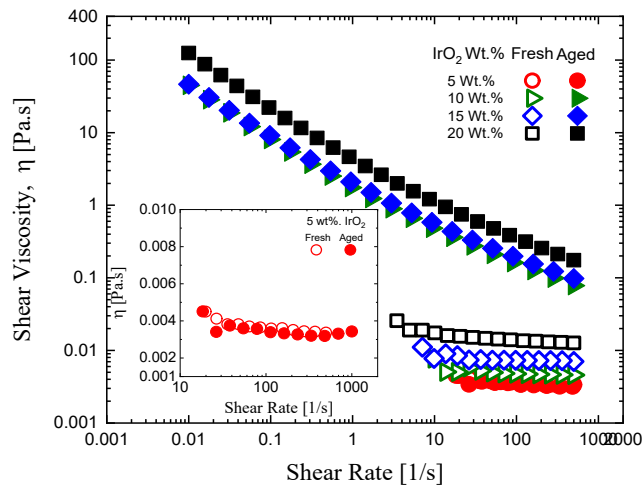

**Figure S12.** Steady-shear rheology of water-rich (90 wt.% H<sub>2</sub>O) inks: Fresh and Aged ( $t_a \sim 96$  h) at a series of IrO<sub>2</sub> concentrations. The ionomer concentration was fixed at 0.2 I/C. The inset shows the data of inks at 5 wt% IrO<sub>2</sub> concentration.

### 3. Effect of ionomer concentration on ink aging: Frequency sweep data

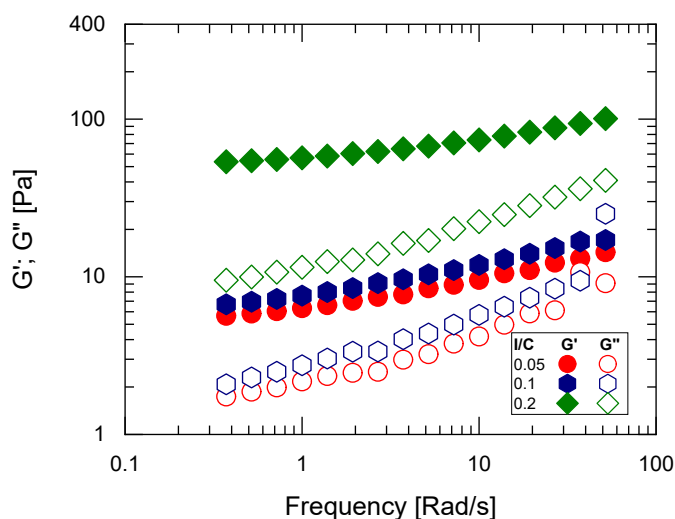

**Figure S13.** Frequency sweep measurements of aged inks (20% IrO<sub>2</sub> – 90% H<sub>2</sub>O) at different I/Cs tested after 96 h aging time.

### 4. USAXS: Volume size distribution plots of fresh water-rich inks

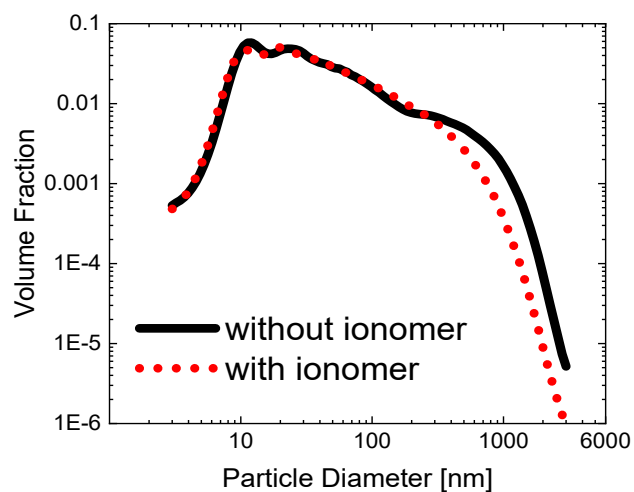

**Figure S14.** Volume size distribution comparison of water-rich inks (30 wt% IrO<sub>2</sub> – 0.1 I/C – 90% H<sub>2</sub>O/10% nPA) with and without ionomer (0.1 I/C) extracted from USAXS scattering curves shown in Figure 4a.

## 5. Electrophoretic Mobility and Dynamic Light Scattering Measurements

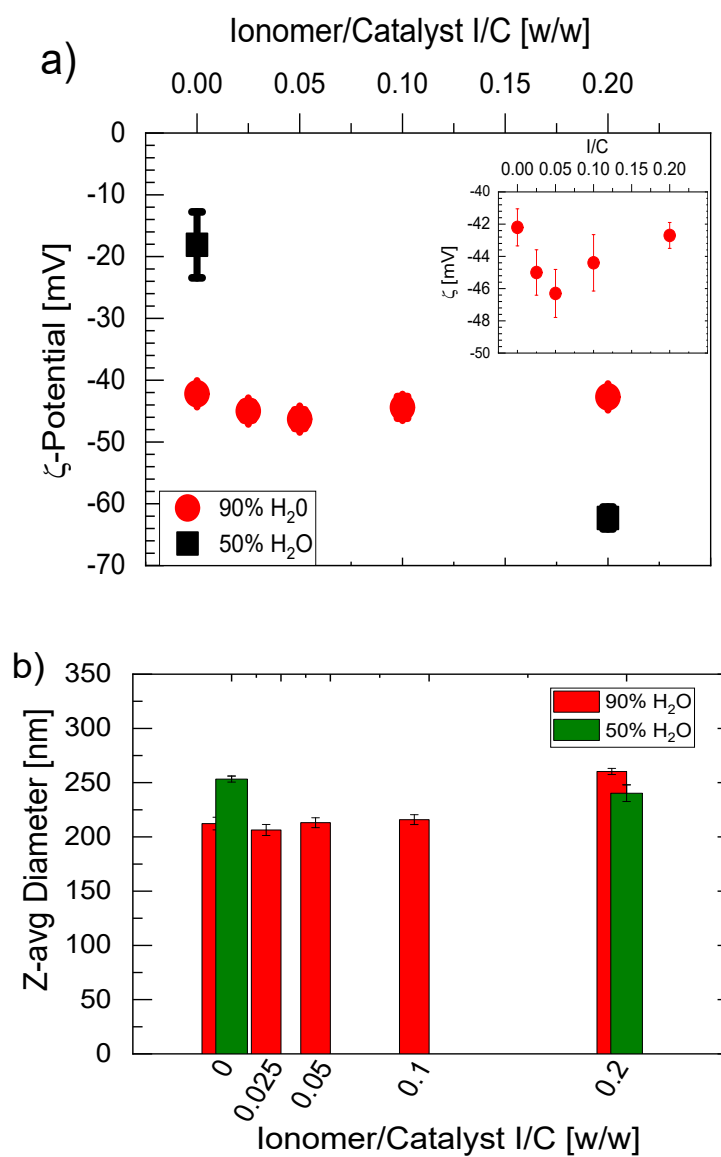

**Figure S15.** a) Zeta potential and Z<sub>avg</sub> size measurements of 0.1% IrO<sub>2</sub> inks at different I/C (D2020). The data include both water-rich (90% H<sub>2</sub>O) and alcohol-rich (50% H<sub>2</sub>O) inks. The inset in Figure a shows zoomed-in zeta potential data of water-rich inks.

## 6. Steady-shear rheology of water-rich neat ionomer dispersions at different aging times

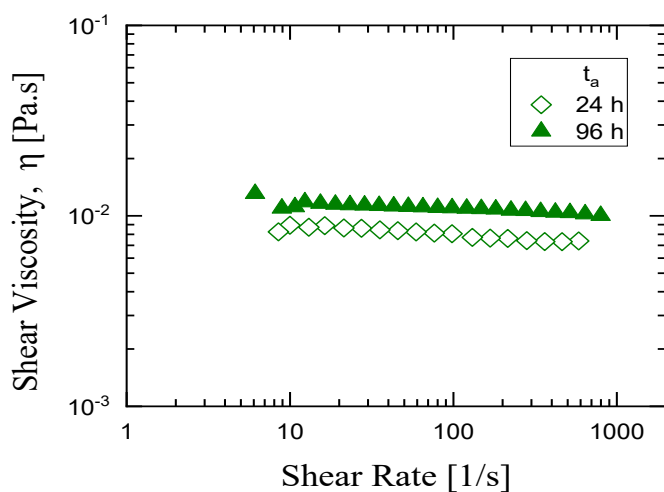

**Figure S16.** Steady-shear rheology of water-rich ionomer dispersions (4.75% ionomer – 90% H<sub>2</sub>O) at different aging times.

## 7. Transient rheology of aged water-rich inks

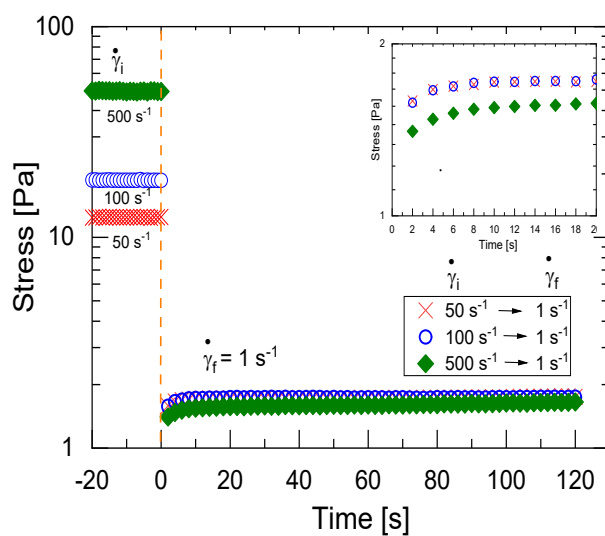

**Figure S17.** Stress evolution in shear rate step-down jump experiments. Shear rate is dropped from different initial shear rates (50, 100, and 500 s<sup>-1</sup>) to 1 s<sup>-1</sup>. The data corresponds to aged (96 h) water-rich inks. 20% IrO<sub>2</sub> – 0.2 I/C – 90% H<sub>2</sub>O.

## 8. Steady-shear rheology data of water-rich inks containing Nafion D2020 and D2021

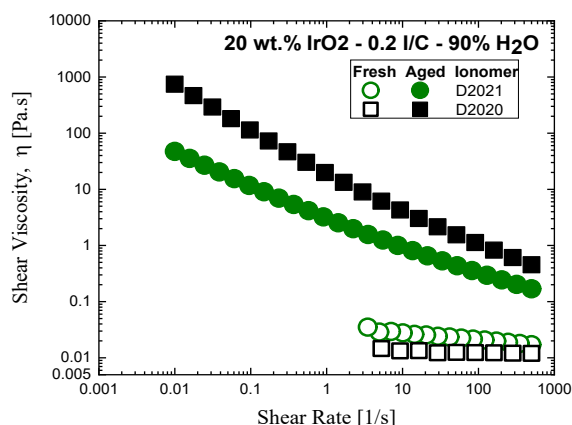

**Figure S18.** Steady-shear rheology of comparison of fresh and aged (96 h) inks consisting of Nafion D2020 and D2021 dispersions.

## 9. EIS Polarization Curves

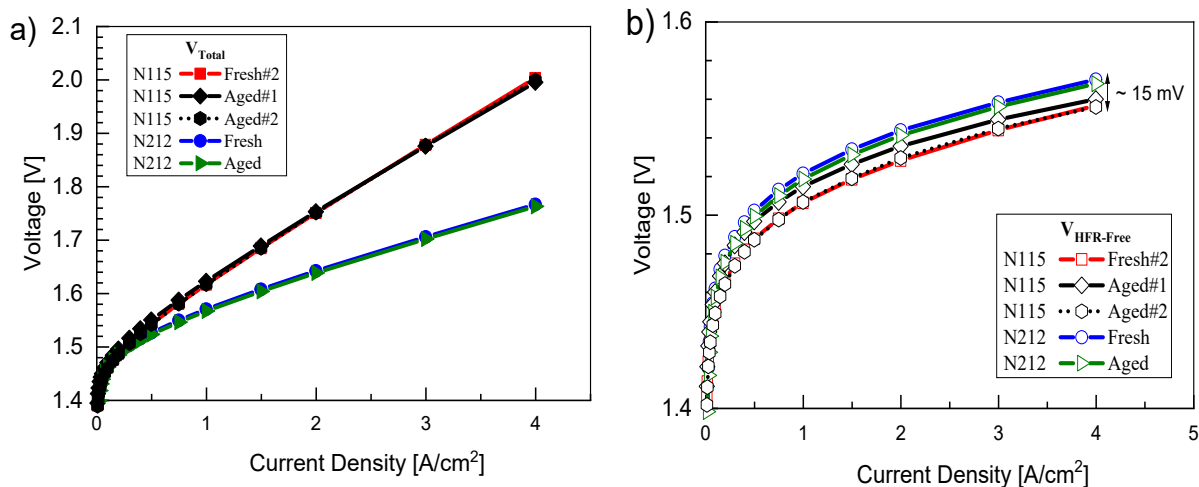

**Figure S19.** Polarization curves measured from EIS of electrodes made from fresh and aged water-rich inks: a)  $V_{Total}$  and b) HFR-corrected ( $V_{HFR-free}$ ) polarization curves. The measurements collected using N212 membrane is also included. The Ir loadings of Fresh and Aged cases tested using N212 membrane were  $0.502 \pm 0.03$  and  $0.598 \pm 0.015$  mgIr/cm<sup>2</sup>, respectively.

## 10. Cyclic Voltammetry Data

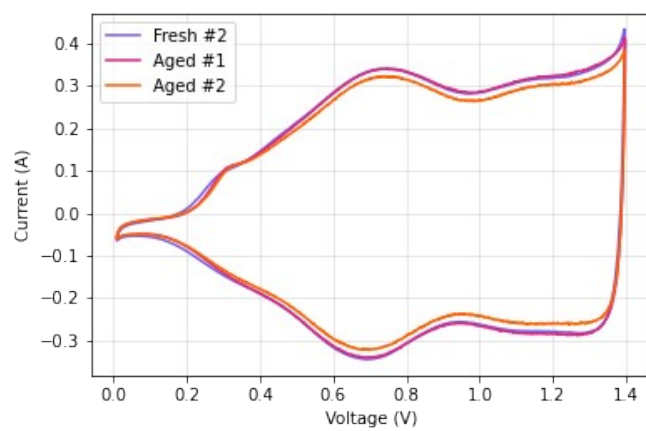

**Figure S110:** Comparison of cyclic voltammetry (CV) following conditioning and EIS measurement for samples where a CV following conditioning was measured.
